# Supplementary material
Source: PubMed Central journal article supplement (PMC4116685)

# Glycolysis/Gluconeogenesis

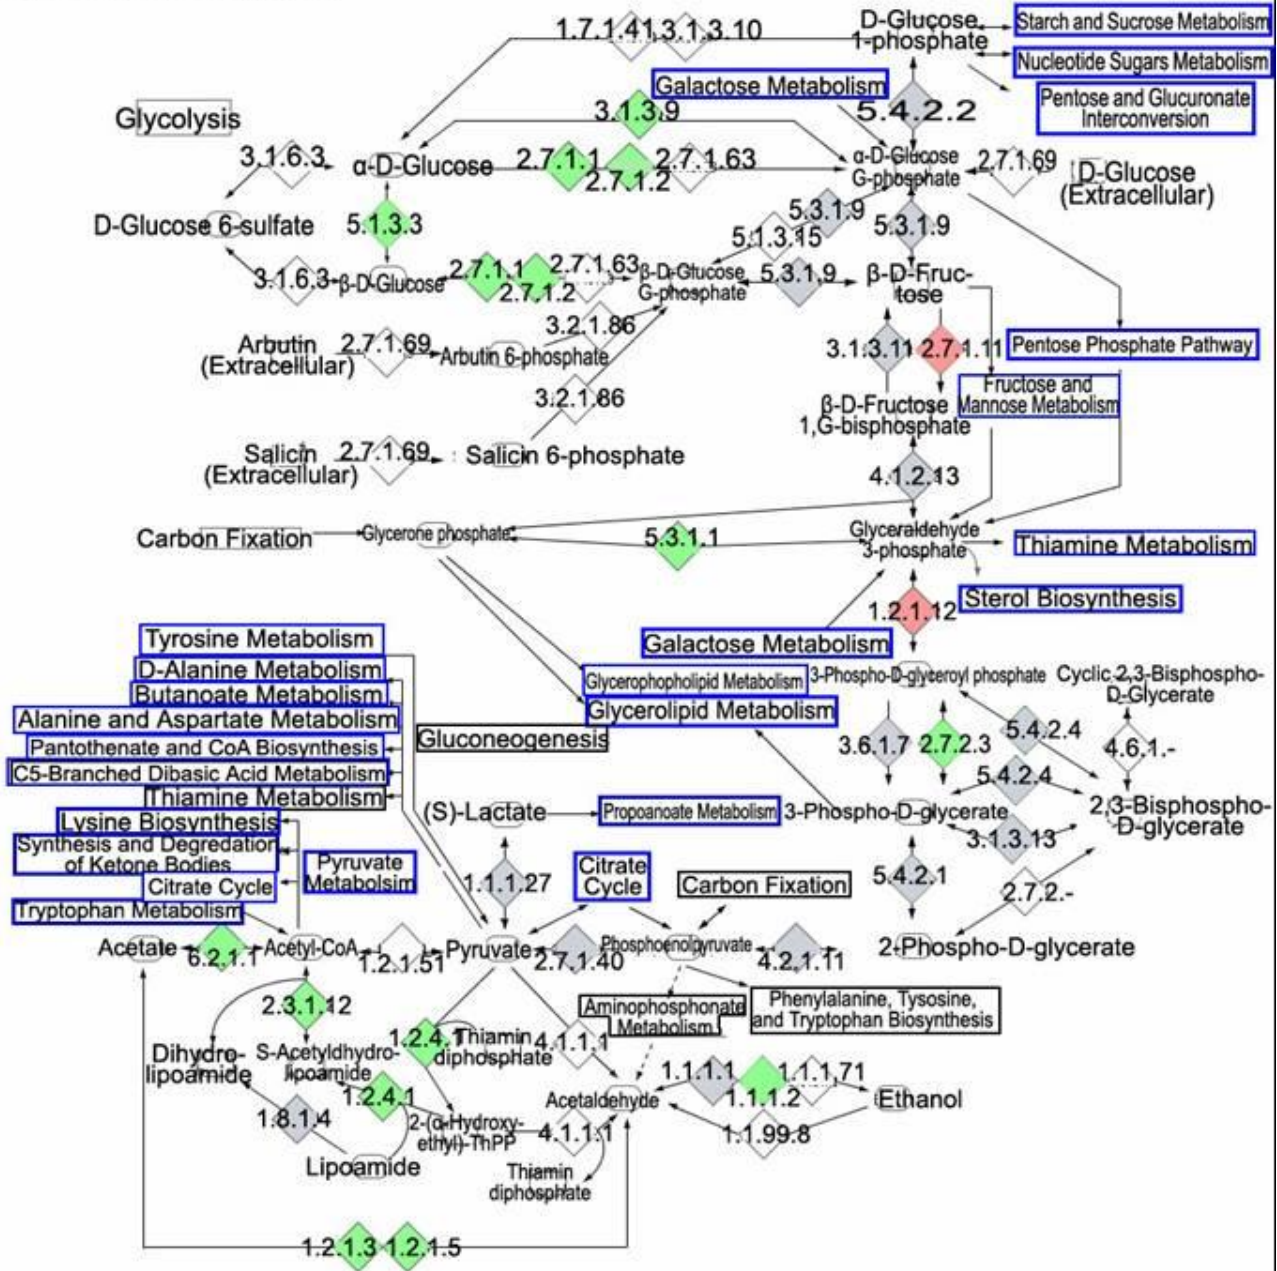

Supplement: NIHMS607401-supplement-2008_Gila_Fig_1.pdf [file NIHMS607401-supplement-2008_Gila_Fig_1.pdf]
